# Supplementary material for: Temporal expression profiling of DAMPs-related genes revealed the biphasic post-ischemic inflammation in the experimental stroke model
Source: PubMed Central journal article supplement (PMC7137489; doi:10.1186/s13041-020-00598-1), 2020-04-07
Supplement: 13041_2020_598_MOESM2_ESM.pdf [file 13041_2020_598_MOESM2_ESM.pdf]

| Gene          | Forward                         | Reverse                           | Reference                                                                                     |
|---------------|---------------------------------|-----------------------------------|-----------------------------------------------------------------------------------------------|
| Len2          | TTT CAC CCG CTT TGC CAA GT      | GTC TCT GCG CAT CCC AGT CA        | PLoS ONE 7(4): e34633                                                                         |
| Fosb          | CCTCCGCCGAGTCTCAGTA             | CCTGGCATGTCATAAGGGTCA             | PrimerBank ID 110350004e1                                                                     |
| Msr1          | TGGAGGAGAGAATCGAAAGCA           | CTGGACTGACGAAATCAAGGAA            | PrimerBank ID 164664519e1                                                                     |
| Ccl2/MCP-1    | GCATCCACGTGTGGCTCA              | CTCCAGCCTACTCATTGGGATCA           | J Immunol January 1, 2011, 186 (1) 423-431                                                    |
| Ccl3/MIP-1    | TGAAACCAGCAGCCTTTGGCTC          | AGGCATTCAGTTCAGGTCAGTG            | J Immunol January 1, 2011, 186 (1) 423-431                                                    |
| Ccl5          | GCTGCTTTGCCTACCTCTCC            | TCGAGTGACAAACACGACTGC             | PrimerBank ID 7305461a1                                                                       |
| CXCL1/KC      | GCTTGAAGGTGTGGCCCTCAG           | AAGCCTCGCGACCATTCTTG              | J Immunol January 1, 2011, 186 (1) 423-431                                                    |
| CXCL2/MIP-2   | GCGCTGTCAATGCCTGAAGA            | TTTGACCGCCCTTGAGAGTG              | J Immunol January 1, 2011, 186 (1) 423-431                                                    |
| CXCL10        | CAAAGTGTGCCGTCATTTTC            | GGCTCGCAGGGATGATTTCAA             | PrimerBank ID 10946576a1                                                                      |
| C3            | GAGGCCACTATGTCCATCCT            | CCAGCAGTCCAGGTCCTTTG              | The American Journal of Pathology 187(5)1186-1197, 2017                                       |
| C3ar1         | TCGATGCTGACACCAATTCAA           | AGTCCCAATAGACAAGTGAGACC           | PrimerBank ID 147904678e1                                                                     |
| Cd51          | GGGGTTGACTGCAACGGAA             | GGCCATCTACTAGACGCACA              | PrimerBank ID 160358822e1                                                                     |
| Cd300ld       | ACATTGACCAAGCCCAAAAA            | AGCAGGGGTAATCCACAAAAG             | PrimerBank ID 21703872a1                                                                      |
| Cd300lf       | CAGCAATCCAAGTACCATTACA          | CTGGTCTCTTTTACTGTGGTTGT           | PrimerBank ID 25092716a1                                                                      |
| Ch25h         | ATGGGCTGTACAACGGTTTC            | CCTTGTCTTATGTTGCCAG               | PrimerBank ID 6857768e1                                                                       |
| H2-Q7         | GAGCAGGCTGGTATTGCAGAG           | CACCATAAGACCTGGGGTGA              | PrimerBank ID 6754140a1                                                                       |
| Mmp3          | CAGACTTGCCCGTTTCCAT             | GGTGTGCTGCATCAAAGA                | Stroke Vase Neurol. 2018 Sep; 3(3): 153-159                                                   |
| Mmp12         | CAAAGCATCCCATCTGCTAT            | GGTCAAAGCAGCTGCATCA               | Stroke Vase Neurol. 2018 Sep; 3(3): 153-159                                                   |
| Mmp13         | TTTATTGTGTCTGCCATGA             | CTCTGGTGTTTGGGATGCT               | Stroke Vase Neurol. 2018 Sep; 3(3): 153-159                                                   |
| Il1m          | TAGACATGGTGCCTATTGACCT          | TCGTGACTATAAGGGGCTCTTC            | PrimerBank ID 227116257e1                                                                     |
| S100a8        | AGTGTCTCAGTTTGTGCAG             | ACTCCTTGTGGCTGTCTTTG              | J Leukoc Biol 82, 111-123.                                                                    |
| S100a9        | GTTGATCTTTCCTGTCTATGAG          | AGCCATTCCCTTAGACTTGG              | J Leukoc Biol 82, 111-123.                                                                    |
| Clec4e        | AGTGCTCTCCTGGACGATAG            | CCTGATGCCTACTGTAGCAG              | PrimerBank ID 9910162a1                                                                       |
| Clec4d        | GAA CAA ATT CTT GCC GTC CTG ACC | TCC ATC ACA AGG ACC ACT TTC TGA G | J Leukoc Biol. 2013 Sep; 94(3): 393-398.                                                      |
| Clec7a        | GACTTCAGCAGCTCAAGACATCC         | TTGTGTGCGCAAAATGCTAGG             | PrimerBank ID 188035929e1                                                                     |
| Lyz2          | ATGGGAATGGCTGGCTACTATGG         | ACCAGTATCGGCTATTGATCTGA           | PrimerBank ID 8393739a1                                                                       |
| Cxcl13        | GGC CAC GGT ATT CTG GAA GC      | ACC GAC AAC AGT TGA AAT CAC TC    | Neuroscience Bulletin doi: 10.1007/s12264-019-00377-6                                         |
| Cxcr2         | ATGCCCTCTATTCTGCCAGAT           | GTGCTCCGGTTGATAAAGATGAC           | PrimerBank ID 6753456a1                                                                       |
| Ccr1          | ACTGCTGTAAGAGCCTTTGGG           | AGCACCAGAATCACTAGGACA             | PrimerBank ID 157012006e1                                                                     |
| Ccr2          | TCCACGCATACTATCAACATC           | TCGTAGTCATACGGTGTGGTG             | PrimerBank ID 160333416e1                                                                     |
| TLR2          | CAGCTGGAGAACTCTGACCC            | CAAAGAGCCTGAAGTGGGAG              | Neurological Sciences August 2013, Volume 34, Issue 8, pp 1339-1346                           |
| TLR4          | CAACATCATCCAGGAAGGC             | GAAGGCGATACAATCCACC               | Neurological Sciences August 2013, Volume 34, Issue 8, pp 1339-1346                           |
| TLR6          | TGGATGTCTCACACAATCGG            | GCAGCTTAGATGCAAGTGAGC             | Neurological Sciences August 2013, Volume 34, Issue 8, pp 1339-1346                           |
| TLR7          | TTCTTCCGTAGGCTGAACC             | GTAAGCTGGATGGCAGATCC              | Neurological Sciences August 2013, Volume 34, Issue 8, pp 1339-1346                           |
| TLR8          | TCTACTTGGCCTTGCAGAGG            | ATGGCAGAGTCGTGACTTCC              | Neurological Sciences August 2013, Volume 34, Issue 8, pp 1339-1346                           |
| TLR13         | ATGGCACAACGGAGAGAAGAA           | CTTTGTATACCCATGCCTCATCAG          | Neurological Sciences August 2013, Volume 34, Issue 8, pp 1339-1346                           |
| IRF7          | AGA GGG CGT TTT ATC TTG CG      | TGG AGC CCA GCA TTT TCT CT        | J Biol Chem. 2016 Jun 17;291(25):13206-15                                                     |
| Nlrp3         | ATCAACAGGCGAGACCTCTG            | GTCTCTGGCATAACCATAGA              | J Immunol 2017; 199:1660-1671;                                                                |
| Pycard        | GACAGTGCAACTGCGAGAAG            | CGACTCCAGATAGTAGTGACAA            | J Immunol 2017; 199:1660-1671;                                                                |
| Cd36          | TTGAAAAGTCTCGGACATTGAG          | TCAGATCCGAACACAGCGTA              | <a href="https://doi.org/10.1073/pnas.1505675112">https://doi.org/10.1073/pnas.1505675112</a> |
| Trem1         | GACTGTCTGTGCGTGTCTTTG           | GCCAAGCCTTCTGGCTGTT               | PrimerBank ID 10946760a1                                                                      |
| Trem2         | GGAACCGTACCATCACTCT             | GGAGGTGCTGTGTTCACTT               | Primer3                                                                                       |
| TYROBP(DAP12) | GAGTGACACTTTCCCAAGATGC          | CCTTGACCTCGGGAGACCA               | PrimerBank ID 6755915a1                                                                       |
| IL-10         | AGTGGAGCAGGTGAAGAGTG            | TTCCGGAGAGAGGTACAACCG             | DOI: 10.1128/MCB.00143-15 Published 17 August 2015                                            |
| TGF-β1        | GCTACCATGCCAACTTCTGT            | CGTAGTAGACGATGGGAGT               | DOI: 10.1128/MCB.00143-15 Published 17 August 2015                                            |
| IL-1β         | CCCAACTGGTACATCAGCAC            | TCTGCTCATTACGAAAAGG               | DOI: 10.1128/MCB.00143-15 Published 17 August 2015                                            |
| TNFα          | CCCCTCTGACCCCTTTACT             | TTTGAGTCTTGTGTTGGT                | DOI: 10.1128/MCB.00143-15 Published 17 August 2015                                            |
| IFN-α         | GGACTTTGGATTCCCGCAGGAGAAG       | GCTGCATCAGACAGCCTTGCAAGTC         | Liu et al. 10.1073/pnas.0901216106                                                            |
| IFN-β         | AACCTCACCTACAGGGCGGACTTCA       | TCCACGTCATCTTCTCTTCTTT            | Liu et al. 10.1073/pnas.0901216106                                                            |
